# Supplementary material for: Economic Growth and Childhood Malnutrition in Low- and Middle-Income Countries
Source: PubMed Central journal article supplement (PMC10636637; doi:10.1001/jamanetworkopen.2023.42654), 2023-11-09
Supplement: jamanetwopen-e2342654-s001.pdf [file jamanetwopen-e2342654-s001.pdf]

## Supplementary Online Content

Büttner N, Heemann M, De Neve JW, Verguet S, Vollmer S, Harttgen K. Economic growth and childhood malnutrition in low- and middle-income countries. *JAMA Netw Open*. 2023;6(11):e2342654. doi:10.1001/jamanetworkopen.2023.42654

**eTable 1.** Number of Surveys and Most Recent Survey Year per Country

**eTable 2.** Definition of Contributing Factors of Malnutrition

**eTable 3.** Adjusted Odds Ratios for Childhood Malnutrition Associated With the Log of Per-Head GDP

**eTable 4.** Association Between Economic Growth and Malnutrition—Sanity Tests

**eTable 5.** Association Between Determinants and Indicators of Malnutrition—Sanity Tests

**eTable 6.** Association Between Economic Growth and Determinants of Malnutrition—Sanity Tests

**eTable 7.** Association Between Economic Growth and Malnutrition—Shorrocks Decomposition

**eTable 8.** Association Between Determinants and Indicators of Malnutrition—Shorrocks Decomposition

**eTable 9.** Association Between Economic Growth and Determinants of Malnutrition—Shorrocks Decomposition

**eFigure 1.** Association Between Determinants and Indicators of Malnutrition—Standard Model (15 Determinants)

**Figure 2.** Association Between Determinants and Indicators of Malnutrition—Extended Model (18 Determinants)

**eFigure 3.** Associations Between Per-Head GDP and Contributing Factors of Malnutrition

This supplementary material has been provided by the authors to give readers additional information about their work.

**eTable 1. Number of Surveys and Most Recent Survey Year per Country**

| <b>Country</b>            | <b>Number of surveys</b> | <b>Most recent survey year</b> |
|---------------------------|--------------------------|--------------------------------|
| Albania                   | 2                        | 2018                           |
| Angola                    | 3                        | 2015                           |
| Armenia                   | 4                        | 2016                           |
| Bangladesh                | 5                        | 2014                           |
| Benin                     | 5                        | 2018                           |
| Bolivia                   | 2                        | 2008                           |
| Burkina Faso              | 4                        | 2010                           |
| Burundi                   | 3                        | 2017                           |
| Cambodia                  | 4                        | 2014                           |
| Cameroon                  | 5                        | 2018                           |
| Chad                      | 3                        | 2015                           |
| Colombia                  | 4                        | 2015                           |
| Comoros                   | 2                        | 2012                           |
| Congo                     | 2                        | 2012                           |
| Congo Democratic Republic | 2                        | 2014                           |
| Cote d'Ivoire             | 3                        | 2012                           |
| Dominican Republic        | 6                        | 2013                           |
| Egypt                     | 5                        | 2014                           |
| Ethiopia                  | 5                        | 2019                           |
| Gabon                     | 2                        | 2012                           |
| Gambia                    | 2                        | 2020                           |
| Ghana                     | 6                        | 2016                           |
| Guatemala                 | 3                        | 2015                           |
| Guinea                    | 5                        | 2021                           |
| Haiti                     | 5                        | 2017                           |
| Honduras                  | 2                        | 2012                           |
| India                     | 3                        | 2020                           |
| Jordan                    | 5                        | 2018                           |
| Kazakhstan                | 2                        | 1999                           |
| Kenya                     | 5                        | 2020                           |
| Kyrgyz Republic           | 2                        | 2012                           |
| Lesotho                   | 3                        | 2014                           |
| Liberia                   | 6                        | 2020                           |
| Madagascar                | 7                        | 2016                           |
| Malawi                    | 7                        | 2017                           |
| Maldives                  | 2                        | 2017                           |
| Mali                      | 5                        | 2018                           |
| Morocco                   | 2                        | 2004                           |
| Mozambique                | 5                        | 2018                           |
| Namibia                   | 4                        | 2013                           |
| Nepal                     | 3                        | 2016                           |
| Nicaragua                 | 2                        | 2001                           |
| Niger                     | 4                        | 2012                           |
| Nigeria                   | 7                        | 2018                           |
| Pakistan                  | 2                        | 2018                           |
| Peru                      | 8                        | 2012                           |
| Rwanda                    | 7                        | 2020                           |
| Senegal                   | 11                       | 2019                           |
| Sierra Leone              | 4                        | 2019                           |
| Tajikistan                | 2                        | 2017                           |
| Tanzania                  | 9                        | 2017                           |
| Timor-Leste               | 2                        | 2016                           |
| Togo                      | 3                        | 2017                           |
| Turkey                    | 3                        | 2013                           |
| Uganda                    | 7                        | 2016                           |
| Yemen                     | 2                        | 2013                           |
| Zambia                    | 6                        | 2018                           |
| Zimbabwe                  | 5                        | 2015                           |

**eTable 2.** Definition of Contributing Factors of Malnutrition

| <b>Contributing factor</b>                                   | <b>Description</b>                                                                                                                                 |
|--------------------------------------------------------------|----------------------------------------------------------------------------------------------------------------------------------------------------|
| <i>Enabling Environments</i>                                 |                                                                                                                                                    |
| No access to safe drinking water                             | =1 if household does not have access to water piped into dwelling, yard or plot, public tap or standpipe, tube well or borehole, or protected well |
| No access to improved sanitation facilities                  | =1 if household does not have access to flush toilet, septic tank, or pit latrine                                                                  |
| Unsafe practices for child's stool disposal                  | =1 if child does not use toilet/latrine, if fecal matter is not disposed by toilet/latrine, disposable diaper or burying                           |
| Inadequate antenatal care                                    | =1 if mother had less than 4 antenatal care visits from a skilled provider for most recent birth                                                   |
| No skilled birth attendant                                   | =1 if child was delivered without skilled birth attendants (e.g., physicians, nurses, midwives)                                                    |
| Unsatisfied family planning needs                            | =1 if mother wishes to stop/delay childbearing, but is not using any modern contraception method                                                   |
| Maternal child marriage                                      | =1 if mother was married before age 18                                                                                                             |
| No maternal education                                        | =1 if mother has no formal education                                                                                                               |
| Low maternal height                                          | =1 if mother's height is less than 145cm/155cm                                                                                                     |
| Low/high maternal BMI                                        | =1 if mother's BMI is less than 18.5 / more than 25.0                                                                                              |
| <i>Proximal Components</i>                                   |                                                                                                                                                    |
| Delayed breastfeeding initiation                             | =1 if mother started breastfeeding of child later than one hour after birth                                                                        |
| No vitamin A supplementation                                 | =1 if child did not receive vitamin A supplement in past 6 months                                                                                  |
| No iodized salt use                                          | =1 if household does not use iodized salt                                                                                                          |
| Incomplete course of vaccination                             | =1 if child is not fully vaccinated against all following diseases: tuberculosis, diphtheria, pertusis, tetanus, polio, measles                    |
| Incidence of infectious diseases                             | =1 if child had diarrhea, cough, or fever in the past 2 weeks                                                                                      |
| No consumption of oral rehydration solution despite diarrhea | =1 if child had diarrhea recently but did not receive oral rehydration therapy                                                                     |
| No care seeking for suspected pneumonia despite cough        | =1 if child had cough in past two weeks and no treatment was sought                                                                                |
| High indoor pollution through solid cooking fuels            | =1 if household uses solid cooking fuels (e.g., coal/lignite, charcoal, wood, straw/shrub/grass, agricultural crops, animal dung)                  |

BMI=body mass index (calculated as weight in kilograms divided by height in meters squared).

**eTable 3.** Adjusted Odds Ratios for Childhood Malnutrition Associated With the Log of Per-Head GDP

|                     | Malnutrition   |               |               |               |               |                           |
|---------------------|----------------|---------------|---------------|---------------|---------------|---------------------------|
|                     | Undernutrition |               |               | Overnutrition |               | Dietary diversity failure |
| Log of per-head GDP | Stunting       | Wasting       | Underweight   | Overweight    | Obesity       |                           |
| <b>OR</b>           | 0.994          | 1.007         | 1.000         | 0.981         | 0.976         | 1.025                     |
| <b>95% CI</b>       | [0.992–0.996]  | [1.003–1.010] | [0.998–1.002] | [0.979–0.984] | [0.973–0.980] | [1.014–1.039]             |
| <b>p-value</b>      | <0.001         | <0.001        | 0.734         | <0.001        | <0.001        | <0.001                    |
| <b>N</b>            | 899,531        | 900,246       | 896,593       | 900,246       | 900,246       | 536,649                   |
| <b>Countries</b>    | 57             | 57            | 57            | 57            | 57            | 36                        |
| <b>Years</b>        | 1990–2020      | 1990–2020     | 1990–2020     | 1990–2020     | 1990–2020     | 2005–2020                 |

Data for the per-head gross domestic product (GDP) were merged with Demographic and Health Survey data by survey-year. Standard errors are clustered at the primary sampling unit level. Odds ratios (ORs) for the log of per-head GDP represent the difference in odds associated with a 5% increase in per-head GDP. All specifications include country and survey-year fixed effects as well as household and child/mother control variables. All ORs are rounded to three decimal places; thus, an OR of 1.000 in the confidence interval (CI) does not necessarily imply that the value 1 is included in the CI.

**eTable 4.** Association Between Economic Growth and Malnutrition—Sanity Tests

|                              | <b>Stunting</b>     | <b>Wasting</b>      | <b>Under-weight</b> | <b>Over-weight</b>  | <b>Obesity</b>      | <b>Dietary Diversity Failure</b> |
|------------------------------|---------------------|---------------------|---------------------|---------------------|---------------------|----------------------------------|
| <b>Unweighted</b>            |                     |                     |                     |                     |                     |                                  |
| Log of per-head GDP (SE)     | -0.0011<br>(0.0002) | 0.0005<br>(0.0001)  | 0.0001<br>(0.0002)  | -0.0011<br>(0.0001) | -0.0006<br>(0.0001) | 0.0033<br>(0.0005)               |
| p value                      | <0.001              | <0.001              | 0.766               | <0.001              | <0.001              | <0.001                           |
| Number of observations       | 899,531             | 900,246             | 896,593             | 900,246             | 900,246             | 536,649                          |
| <b>Weighted</b>              |                     |                     |                     |                     |                     |                                  |
| Log of per-head GDP (SE)     | -0.0027<br>(0.0003) | 0.0003<br>(0.0002)  | 0.0002<br>(0.0003)  | -0.0025<br>(0.0002) | -0.0012<br>(0.0002) | 0.0040<br>(0.0005)               |
| p value                      | <0.001              | 0.131               | 0.400               | <0.001              | <0.001              | <0.001                           |
| Number of observations       | 899,531             | 900,246             | 896,593             | 900,246             | 900,246             | 536,649                          |
| <b>Trimmed</b>               |                     |                     |                     |                     |                     |                                  |
| Log of per-head GDP (SE)     | -0.0010<br>(0.0002) | -0.0002<br>(0.0001) | 0.0001<br>(0.0002)  | -0.0002<br>(0.0001) | -0.0001<br>(0.0001) | 0.0032<br>(0.0006)               |
| p value                      | <0.001              | 0.215               | 0.654               | 0.060               | 0.034               | <0.001                           |
| Number of observations       | 871,913             | 683,221             | 845,741             | 857,824             | 865,145             | 520,930                          |
| <b>Instrumental Variable</b> |                     |                     |                     |                     |                     |                                  |
| Log of per-head GDP (SE)     | -0.0133<br>(0.0083) | 0.0040<br>(0.0052)  | 0.0394<br>(0.0107)  | -0.0219<br>(0.0042) | -0.0096<br>(0.0021) | -0.0091<br>(0.0024)              |
| p value                      | 0.111               | 0.434               | <0.001              | <0.001              | <0.001              | <0.001                           |
| Number of observations       | 899,009             | 899,685             | 896,071             | 899,685             | 899,685             | 536,649                          |

Data for the per-head gross domestic product (GDP) were merged with Demographic and Health Survey data by survey year. All regressions are ordinary least squares, and the instrumental variable regressions are two-stage least squares. All specifications include country and survey-year fixed effects as well as household and child/mother control variables. SEs are clustered at the PSU level. Coefficients for the log of per-head GDP represent a 5% increase in per-head GDP. In the instrumental variable regressions, we used the variable share of gross capital formation at present purchasing power parity (investment share of GDP) from the Penn World Tables 10.0, with a 5-year lag as an instrument for the log of the per-head GDP.

**eTable 5.** Association Between Determinants and Indicators of Malnutrition—Sanity Tests

|                                           | Stunting          |                   |                   | Wasting           |                   |                   | Underweight       |                   |                   |
|-------------------------------------------|-------------------|-------------------|-------------------|-------------------|-------------------|-------------------|-------------------|-------------------|-------------------|
|                                           | Un-weighted       | Weighted          | Trimmed           | Un-weighted       | Weighted          | Trimmed           | Un-weighted       | Weighted          | Trimmed           |
| <b>Delayed breastfeeding (SE)</b>         | -0.002<br>(0.002) | 0.001<br>(0.004)  | -0.003<br>(0.002) | 0.003<br>(0.002)  | -0.001<br>(0.003) | 0.002<br>(0.002)  | 0.005<br>(0.002)  | 0.000<br>(0.004)  | 0.004<br>(0.002)  |
| <b>p value</b>                            | 0.313             | 0.847             | 0.249             | 0.107             | 0.598             | 0.184             | 0.046             | 0.986             | 0.069             |
| <b>Incomplete vaccination (SE)</b>        | -0.022<br>(0.003) | -0.016<br>(0.005) | -0.021<br>(0.003) | -0.016<br>(0.002) | -0.021<br>(0.003) | -0.016<br>(0.002) | -0.026<br>(0.003) | -0.028<br>(0.005) | -0.026<br>(0.003) |
| <b>p value</b>                            | <0.001            | 0.001             | <0.001            | <0.001            | <0.001            | <0.001            | <0.001            | <0.001            | <0.001            |
| <b>Recent infectious disease (SE)</b>     | 0.010<br>(0.003)  | 0.017<br>(0.005)  | 0.009<br>(0.003)  | 0.015<br>(0.002)  | 0.017<br>(0.003)  | 0.015<br>(0.002)  | 0.032<br>(0.003)  | 0.038<br>(0.005)  | 0.032<br>(0.003)  |
| <b>p value</b>                            | 0.001             | <0.001            | 0.002             | <0.001            | <0.001            | <0.001            | <0.001            | <0.001            | <0.001            |
| <b>No ORT given with diarrhea (SE)</b>    | 0.007<br>(0.004)  | 0.013<br>(0.008)  | 0.006<br>(0.004)  | -0.000<br>(0.003) | -0.006<br>(0.006) | -0.001<br>(0.003) | 0.008<br>(0.004)  | 0.015<br>(0.009)  | 0.008<br>(0.004)  |
| <b>p value</b>                            | 0.098             | 0.125             | 0.149             | 0.902             | 0.263             | 0.863             | 0.050             | 0.072             | 0.065             |
| <b>No care sought for cough (SE)</b>      | -0.011<br>(0.005) | -0.012<br>(0.009) | -0.010<br>(0.005) | -0.009<br>(0.003) | -0.000<br>(0.007) | -0.009<br>(0.003) | -0.014<br>(0.004) | -0.003<br>(0.009) | -0.013<br>(0.004) |
| <b>p value</b>                            | 0.015             | 0.199             | 0.030             | 0.004             | 0.956             | 0.003             | 0.002             | 0.766             | 0.003             |
| <b>High indoor pollution (SE)</b>         | -0.008<br>(0.003) | 0.005<br>(0.006)  | -0.009<br>(0.003) | -0.009<br>(0.002) | -0.004<br>(0.004) | -0.008<br>(0.002) | -0.008<br>(0.003) | -0.003<br>(0.006) | -0.008<br>(0.003) |
| <b>p value</b>                            | 0.014             | 0.426             | 0.011             | 0.000             | 0.328             | <0.001            | 0.014             | 0.638             | 0.012             |
| <b>No access safe drinking water (SE)</b> | 0.019<br>(0.003)  | 0.014<br>(0.005)  | 0.019<br>(0.003)  | 0.008<br>(0.002)  | 0.002<br>(0.004)  | 0.008<br>(0.002)  | 0.026<br>(0.003)  | 0.018<br>(0.005)  | 0.026<br>(0.003)  |
| <b>p value</b>                            | <0.001            | 0.005             | <0.001            | 0.001             | 0.664             | 0.001             | <0.001            | 0.001             | <0.001            |
| <b>No access improved sanitation (SE)</b> | 0.018<br>(0.003)  | 0.024<br>(0.004)  | 0.018<br>(0.003)  | 0.001<br>(0.002)  | 0.003<br>(0.003)  | 0.001<br>(0.002)  | 0.016<br>(0.003)  | 0.016<br>(0.004)  | 0.016<br>(0.003)  |
| <b>p value</b>                            | <0.001            | <0.001            | <0.001            | 0.523             | 0.359             | 0.461             | <0.001            | <0.001            | <0.001            |
| <b>Inadequate antenatal care (SE)</b>     | 0.038<br>(0.004)  | 0.034<br>(0.006)  | 0.038<br>(0.004)  | 0.004<br>(0.002)  | 0.009<br>(0.004)  | 0.004<br>(0.003)  | 0.023<br>(0.003)  | 0.031<br>(0.006)  | 0.023<br>(0.003)  |
| <b>p value</b>                            | <0.001            | <0.001            | <0.001            | 0.109             | 0.041             | 0.121             | 0.000             | 0.000             | 0.000             |
| <b>No skilled birth attendant (SE)</b>    | 0.011<br>(0.003)  | 0.009<br>(0.006)  | 0.012<br>(0.003)  | 0.004<br>(0.002)  | 0.015<br>(0.004)  | 0.004<br>(0.002)  | 0.013<br>(0.003)  | 0.018<br>(0.006)  | 0.013<br>(0.003)  |
| <b>p value</b>                            | 0.001             | 0.147             | <0.001            | 0.072             | <0.001            | 0.066             | <0.001            | 0.005             | <0.001            |
| <b>Unsatisfied family planning (SE)</b>   | 0.011<br>(0.003)  | 0.010<br>(0.004)  | 0.011<br>(0.003)  | 0.002<br>(0.002)  | 0.004<br>(0.003)  | 0.002<br>(0.002)  | 0.011<br>(0.002)  | 0.007<br>(0.004)  | 0.010<br>(0.003)  |
| <b>p value</b>                            | <0.001            | 0.020             | <0.001            | 0.197             | 0.150             | 0.305             | <0.001            | 0.089             | <0.001            |
| <b>Maternal child marriage (SE)</b>       | 0.010<br>(0.003)  | 0.010<br>(0.006)  | 0.010<br>(0.003)  | 0.007<br>(0.003)  | 0.006<br>(0.004)  | 0.006<br>(0.003)  | 0.017<br>(0.003)  | 0.017<br>(0.006)  | 0.016<br>(0.003)  |
| <b>p value</b>                            | 0.002             | 0.085             | 0.003             | 0.013             | 0.155             | 0.020             | <0.001            | 0.005             | <0.001            |
| <b>No maternal education (SE)</b>         | 0.049<br>(0.004)  | 0.060<br>(0.005)  | 0.049<br>(0.004)  | 0.015<br>(0.003)  | 0.018<br>(0.004)  | 0.015<br>(0.003)  | 0.053<br>(0.003)  | 0.059<br>(0.005)  | 0.053<br>(0.003)  |
| <b>p value</b>                            | <0.001            | <0.001            | <0.001            | <0.001            | <0.001            | <0.001            | <0.001            | <0.001            | <0.001            |
| <b>Low maternal height (SE)</b>           | 0.178<br>(0.005)  | 0.168<br>(0.008)  | 0.179<br>(0.005)  | 0.005<br>(0.004)  | 0.006<br>(0.005)  | 0.005<br>(0.004)  | 0.129<br>(0.005)  | 0.136<br>(0.007)  | 0.131<br>(0.005)  |
| <b>p value</b>                            | <0.001            | <0.001            | <0.001            | 0.202             | 0.238             | 0.215             | <0.001            | <0.001            | <0.001            |
| <b>Low maternal BMI (SE)</b>              | 0.066<br>(0.004)  | 0.064<br>(0.006)  | 0.068<br>(0.004)  | 0.057<br>(0.003)  | 0.054<br>(0.004)  | 0.057<br>(0.003)  | 0.135<br>(0.004)  | 0.134<br>(0.006)  | 0.136<br>(0.004)  |
| <b>p value</b>                            | <0.001            | <0.001            | <0.001            | <0.001            | <0.001            | <0.001            | <0.001            | <0.001            | <0.001            |
| <b>Number of observations</b>             | 135,310           | 135,310           | 131,580           | 135,669           | 135,669           | 131,506           | 135,567           | 135,567           | 131,83            |

7

## Part 1

BMI=body mass index (calculated as weight in kilograms divided by height in meters squared). ORT=oral rehydration therapy. All regressions are ordinary least squares. All specifications are ordinary least squares and include country-fixed effects as well as household and child/mother control variables. SEs are clustered at the PSU level.

|                                           | Overweight        |                   |                   | Obesity           |                   |                   | Dietary Diversity Failure |                   |                   |
|-------------------------------------------|-------------------|-------------------|-------------------|-------------------|-------------------|-------------------|---------------------------|-------------------|-------------------|
|                                           | Un-weighted       | Weighted          | Trimmed           | Un-weighted       | Weighted          | Trimmed           | Un-weighted               | Weighted          | Trimmed           |
| <b>Delayed breastfeeding (SE)</b>         | 0-000<br>(0-001)  | -0-000<br>(0-001) | 0-000<br>(0-001)  | -0-001<br>(0-001) | -0-001<br>(0-001) | -0-001<br>(0-001) | 0-015<br>(0-003)          | 0-009<br>(0-004)  | 0-015<br>(0-003)  |
| <b>p value</b>                            | 0-921             | 0-781             | 0-909             | 0-057             | 0-121             | 0-068             | 0-000                     | 0-015             | <0-001            |
| <b>Incomplete vaccination (SE)</b>        | 0-009<br>(0-001)  | 0-008<br>(0-001)  | 0-009<br>(0-001)  | 0-003<br>(0-001)  | 0-004<br>(0-001)  | 0-003<br>(0-001)  | 0-051<br>(0-003)          | 0-033<br>(0-005)  | 0-050<br>(0-004)  |
| <b>p value</b>                            | <0-001            | <0-001            | <0-001            | <0-001            | <0-001            | <0-001            | <0-001                    | <0-001            | <0-001            |
| <b>Recent infectious disease(SE)</b>      | -0-008<br>(0-001) | -0-009<br>(0-002) | -0-009<br>(0-001) | -0-003<br>(0-001) | -0-003<br>(0-001) | -0-003<br>(0-001) | -0-028<br>(0-003)         | -0-019<br>(0-005) | -0-028<br>(0-003) |
| <b>p value</b>                            | <0-001            | <0-001            | <0-001            | <0-001            | 0-004             | <0-001            | <0-001                    | <0-001            | <0-001            |
| <b>No ORT given with diarrhea(SE)</b>     | -0-003<br>(0-002) | -0-004<br>(0-002) | -0-004<br>(0-002) | -0-002<br>(0-001) | -0-003<br>(0-001) | -0-002<br>(0-001) | 0-033<br>(0-005)          | 0-030<br>(0-007)  | 0-033<br>(0-005)  |
| <b>p value</b>                            | 0-079             | 0-137             | 0-067             | 0-044             | 0-027             | 0-044             | <0-001                    | <0-001            | <0-001            |
| <b>No care sought for cough (SE)</b>      | 0-001<br>(0-002)  | 0-006<br>(0-004)  | 0-001<br>(0-002)  | -0-001<br>(0-001) | 0-001<br>(0-002)  | -0-001<br>(0-001) | 0-026<br>(0-006)          | 0-018<br>(0-009)  | 0-026<br>(0-006)  |
| <b>p value</b>                            | 0-731             | 0-108             | 0-785             | 0-387             | 0-569             | 0-368             | <0-001                    | 0-042             | <0-001            |
| <b>High indoor pollution (SE)</b>         | -0-002<br>(0-001) | -0-003<br>(0-002) | -0-002<br>(0-001) | -0-001<br>(0-001) | -0-001<br>(0-001) | -0-001<br>(0-001) | -0-005<br>(0-004)         | 0-005<br>(0-005)  | -0-004<br>(0-004) |
| <b>p value</b>                            | 0-107             | 0-067             | 0-074             | 0-236             | 0-164             | 0-180             | 0-200                     | 0-318             | 0-234             |
| <b>No access safe drinking water (SE)</b> | -0-001<br>(0-001) | -0-003<br>(0-002) | -0-001<br>(0-001) | 0-001<br>(0-001)  | 0-000<br>(0-001)  | 0-001<br>(0-001)  | 0-021<br>(0-003)          | 0-021<br>(0-005)  | 0-022<br>(0-003)  |
| <b>p value</b>                            | 0-317             | 0-084             | 0-257             | 0-041             | 0-657             | 0-067             | <0-001                    | <0-001            | <0-001            |
| <b>No access improved sanitation (SE)</b> | -0-001<br>(0-001) | -0-002<br>(0-001) | -0-001<br>(0-001) | -0-001<br>(0-001) | -0-002<br>(0-001) | -0-001<br>(0-001) | 0-022<br>(0-003)          | 0-025<br>(0-004)  | 0-022<br>(0-003)  |
| <b>p value</b>                            | 0-310             | 0-266             | 0-304             | 0-346             | 0-055             | 0-260             | <0-001                    | <0-001            | <0-001            |
| <b>Inadequate antenatal care (SE)</b>     | -0-000<br>(0-001) | 0-001<br>(0-002)  | -0-001<br>(0-001) | 0-000<br>(0-001)  | 0-000<br>(0-001)  | 0-000<br>(0-001)  | 0-023<br>(0-004)          | 0-009<br>(0-005)  | 0-023<br>(0-004)  |
| <b>p value</b>                            | 0-891             | 0-517             | 0-571             | 0-763             | 0-799             | 0-947             | <0-001                    | 0-090             | <0-001            |
| <b>No skilled birth attendant (SE)</b>    | 0-000<br>(0-002)  | 0-000<br>(0-002)  | 0-000<br>(0-002)  | -0-001<br>(0-001) | -0-000<br>(0-001) | -0-001<br>(0-001) | 0-034<br>(0-004)          | 0-022<br>(0-006)  | 0-033<br>(0-004)  |
| <b>p value</b>                            | 0-880             | 0-832             | 0-770             | 0-081             | 0-724             | 0-129             | <0-001                    | <0-001            | <0-001            |
| <b>Unsatisfied family planning(SE)</b>    | -0-002<br>(0-001) | -0-002<br>(0-002) | -0-002<br>(0-001) | -0-002<br>(0-001) | -0-002<br>(0-001) | -0-002<br>(0-001) | 0-006<br>(0-003)          | 0-008<br>(0-004)  | 0-007<br>(0-003)  |
| <b>p value</b>                            | 0-037             | 0-143             | 0-105             | 0-004             | 0-002             | 0-010             | 0-025                     | 0-055             | 0-021             |
| <b>Maternal child marriage (SE)</b>       | -0-003<br>(0-002) | -0-004<br>(0-002) | -0-003<br>(0-002) | -0-000<br>(0-001) | -0-000<br>(0-001) | -0-000<br>(0-001) | 0-008<br>(0-004)          | 0-005<br>(0-006)  | 0-007<br>(0-004)  |
| <b>p value</b>                            | 0-029             | 0-058             | 0-036             | 0-994             | 0-891             | 0-973             | 0-035                     | 0-459             | 0-065             |
| <b>No maternal education (SE)</b>         | -0-002<br>(0-001) | -0-003<br>(0-002) | -0-002<br>(0-001) | -0-000<br>(0-001) | -0-001<br>(0-001) | -0-000<br>(0-001) | 0-021<br>(0-004)          | 0-025<br>(0-005)  | 0-022<br>(0-004)  |
| <b>p value</b>                            | 0-240             | 0-111             | 0-264             | 0-573             | 0-520             | 0-530             | <0-001                    | <0-001            | <0-001            |
| <b>Low maternal height (SE)</b>           | -0-004<br>(0-002) | -0-002<br>(0-002) | -0-004<br>(0-002) | -0-002<br>(0-001) | -0-001<br>(0-001) | -0-002<br>(0-001) | 0-011<br>(0-005)          | 0-008<br>(0-006)  | 0-010<br>(0-005)  |
| <b>p value</b>                            | 0-063             | 0-279             | 0-063             | 0-074             | 0-176             | 0-077             | 0-030                     | 0-192             | 0-044             |
| <b>Low maternal BMI (SE)</b>              |                   |                   |                   |                   |                   |                   | 0-010<br>(0-004)          | 0-011<br>(0-005)  | 0-011<br>(0-004)  |
| <b>p value</b>                            |                   |                   |                   |                   |                   |                   | 0-005                     | 0-030             | 0-005             |
| <b>High maternal BMI (SE)</b>             | 0-014<br>(0-001)  | 0-012<br>(0-002)  | 0-014<br>(0-001)  | 0-005<br>(0-001)  | 0-004<br>(0-001)  | 0-005<br>(0-001)  |                           |                   |                   |
| <b>p value</b>                            | <0-001            | <0-001            | <0-001            | <0-001            | <0-001            | <0-001            |                           |                   |                   |
| <b>Number of observations</b>             | 135,669           | 135,669           | 134,207           | 134,079           | 134,079           | 133,555           | 98,842                    | 98,842            | 94,962            |

## Part 2

BMI=body mass index (calculated as weight in kilograms divided by height in meters squared). ORT=oral rehydration therapy. All regressions are ordinary least squares. All specifications are ordinary least squares and include country-fixed effects as well as household and child/mother control variables. SEs are clustered at the PSU level.

**eTable 6.** Association Between Economic Growth and Determinants of Malnutrition—Sanity Tests

|                              | Delayed breastfeeding | No vitamin A suppl. | No iodized salt use | Incomplete vaccination | Recent infectious disease | No ORT given with diarrhea | No care sought for cough | High indoor pollution |
|------------------------------|-----------------------|---------------------|---------------------|------------------------|---------------------------|----------------------------|--------------------------|-----------------------|
| <b>Unweighted</b>            |                       |                     |                     |                        |                           |                            |                          |                       |
| Log of per-head GDP          | 0.0025                | -0.0015             | -0.0328             | 0.0004                 | 0.0019                    | -0.0004                    | 0.0008                   | -0.0048               |
| (SE)                         | (0.0003)              | (0.0003)            | (0.0016)            | (0.0002)               | (0.0002)                  | (0.0001)                   | (0.0001)                 | (0.0002)              |
| p value                      | <0.001                | <0.001              | <0.001              | 0.062                  | <0.001                    | 0.004                      | <0.001                   | <0.001                |
| Number of observations       | 910,642               | 834,572             | 419,397             | 1,051,314              | 1,067,017                 | 1,041,452                  | 1,019,887                | 977,267               |
| <b>Weighted</b>              |                       |                     |                     |                        |                           |                            |                          |                       |
| Log of per-head GDP          | 0.0032                | -0.0015             | -0.0550             | -0.0005                | 0.0015                    | -0.0006                    | -0.0003                  | -0.0036               |
| (SE)                         | (0.0003)              | (0.0004)            | (0.0014)            | (0.0002)               | (0.0003)                  | (0.0002)                   | (0.0001)                 | (0.0004)              |
| p value                      | <0.001                | <0.001              | <0.001              | 0.021                  | <0.001                    | <0.001                     | 0.061                    | <0.001                |
| Number of observations       | 910,642               | 834,572             | 419,397             | 1,051,314              | 1,067,017                 | 1,041,452                  | 1,019,887                | 977,267               |
| <b>Trimmed</b>               |                       |                     |                     |                        |                           |                            |                          |                       |
| Log of per-head GDP          | 0.0025                | -0.0023             | -0.0305             | 0.0001                 | 0.0012                    | -0.0001                    | 0.0008                   | -0.0051               |
| (SE)                         | (0.0003)              | (0.0004)            | (0.0017)            | (0.0002)               | (0.0002)                  | (0.0001)                   | (0.0001)                 | (0.0002)              |
| p value                      | <0.001                | <0.001              | <0.001              | 0.508                  | <0.001                    | 0.368                      | <0.001                   | <0.001                |
| Number of observations       | 883,445               | 824,240             | 414,444             | 1,016,255              | 1,048,261                 | 1,005,715                  | 876,281                  | 940,003               |
| <b>Instrumental Variable</b> |                       |                     |                     |                        |                           |                            |                          |                       |
| Log of per-head GDP          | 0.0130                | -0.0514             | 0.0138              | -0.0130                | 0.0210                    | 0.0038                     | 0.0021                   | 0.0085                |
| (SE)                         | (0.0056)              | (0.0037)            | (0.0194)            | (0.0054)               | (0.0033)                  | (0.0018)                   | (0.0017)                 | (0.0063)              |
| p value                      | 0.019                 | <0.001              | 0.478               | 0.016                  | <0.001                    | 0.038                      | 0.207                    | 0.177                 |
| Number of observations       | 910,642               | 833,883             | 419,397             | 1,050,158              | 1,065,511                 | 1,040,450                  | 1,019,229                | 972,927               |

**Part 1**

ORT=oral rehydration therapy. Data for per-head gross domestic product (GDP) were merged with Demographic and Health Survey data by survey year. All regressions are ordinary least squares, and the instrumental variable regressions are two-stage least squares. All specifications include country and survey-year fixed effects as well as household control variables. SEs are clustered at the PSU level. Coefficients for the log of per-head GDP represent a 5% increase in per-head GDP. In the instrumental variable regressions, we used the variable share of gross capital formation at present purchasing power parity (investment share of GDP) from the Penn World Tables 10.0, with a 5-year lag as an instrument for the log of the per-head GDP.



|                              | No access safe drinking water | No access improved sanitation | Unsafe stool disposal | Inadequate antenatal care | No skilled birth attendant | Unsatisfied family planning | Maternal child marriage | No maternal educ. | Low maternal height | Low maternal BMI |
|------------------------------|-------------------------------|-------------------------------|-----------------------|---------------------------|----------------------------|-----------------------------|-------------------------|-------------------|---------------------|------------------|
| <b>Unweighted</b>            |                               |                               |                       |                           |                            |                             |                         |                   |                     |                  |
| Log of per-head GDP (SE)     | 0.0018 (0.0003)               | -0.0021 (0.0003)              | -0.0096 (0.0005)      | -0.0027 (0.0002)          | -0.0004 (0.0002)           | 0.0016 (0.0003)             | -0.0003 (0.0002)        | -0.0001 (0.0002)  | -0.0008 (0.0001)    | -0.0009 (0.0002) |
| p value                      | <0.001                        | <0.001                        | <0.001                | <0.001                    | 0.082                      | <0.001                      | 0.149                   | 0.522             | <0.001              | <0.001           |
| Number of observations       | 1,082,733                     | 1,094,647                     | 753,504               | 970,018                   | 1,077,132                  | 637,120                     | 1,035,846               | 1,138,568         | 902,576             | 826,307          |
| <b>Weighted</b>              |                               |                               |                       |                           |                            |                             |                         |                   |                     |                  |
| Log of per-head GDP (SE)     | -0.0027 (0.0005)              | -0.0027 (0.0004)              | -0.0101 (0.0007)      | -0.0006 (0.0003)          | 0.0006 (0.0003)            | 0.0007 (0.0004)             | 0.0009 (0.0003)         | -0.0000 (0.0003)  | -0.0008 (0.0001)    | -0.0009 (0.0002) |
| p value                      | <0.001                        | <0.001                        | <0.001                | 0.048                     | 0.090                      | 0.084                       | 0.003                   | 0.972             | <0.001              | <0.001           |
| Number of observations       | 1,082,733                     | 1,094,647                     | 753,504               | 970,018                   | 1,077,132                  | 637,120                     | 1,035,846               | 1,138,568         | 902,576             | 826,307          |
| <b>Trimmed</b>               |                               |                               |                       |                           |                            |                             |                         |                   |                     |                  |
| Log of per-head GDP (SE)     | 0.0014 (0.0003)               | -0.0018 (0.0003)              | -0.0076 (0.0005)      | -0.0027 (0.0002)          | -0.0005 (0.0003)           | 0.0017 (0.0003)             | -0.0003 (0.0002)        | 0.0003 (0.0002)   | -0.0006 (0.0001)    | -0.0003 (0.0002) |
| p value                      | <0.001                        | <0.001                        | <0.001                | <0.001                    | 0.039                      | <0.001                      | 0.200                   | 0.170             | <0.001              | 0.070            |
| Number of observations       | 1,052,950                     | 1,045,435                     | 733,816               | 940,669                   | 1,047,046                  | 543,821                     | 1,005,954               | 1,107,621         | 877,445             | 753,075          |
| <b>Instrumental Variable</b> |                               |                               |                       |                           |                            |                             |                         |                   |                     |                  |
| Log of per-head GDP (SE)     | -0.0748 (0.0099)              | -0.0513 (0.0052)              | -0.0375 (0.0033)      | -0.0036 (0.0028)          | 0.0981 (0.0091)            | 0.4495 (0.3455)             | 0.0115 (0.0039)         | 0.0166 (0.0039)   | 0.0010 (0.0011)     | 0.0010 (0.0017)  |
| p value                      | <0.001                        | <0.001                        | <0.001                | 0.204                     | <0.001                     | 0.193                       | 0.003                   | <0.001            | 0.373               | 0.551            |
| Number of observations       | 1,077,165                     | 1,089,079                     | 753,504               | 964,891                   | 1,075,934                  | 637,120                     | 1,034,645               | 1,136,720         | 902,576             | 826,307          |

## Part 2

BMI=body mass index (calculated as weight in kilograms divided by height in meters squared). Data for the per-head gross domestic product (GDP) were merged with Demographic and Health Survey data by survey year. All regressions are ordinary least squares, and the instrumental variable regressions are two-stage least squares. All specifications include country and survey-year fixed effects as well as household control variables. SEs are clustered at the PSU level. Coefficients for the log of per-head GDP represent a 5% increase in per-head GDP. In the instrumental variable regressions, we used the variable share of gross capital formation at present purchasing power parity (investment share of GDP) from the Penn World Tables 10.0, with a 5-year lag as an instrument for the log of the per-head GDP.

**eTable 7.** Association Between Economic Growth and Malnutrition—Shorrocks Decomposition

| Contribution of explanatory variables to pseudo R-squared (%) | Stunting | Wasting | Under-weight | Over-weight | Obesity | Dietary Diversity Failure |
|---------------------------------------------------------------|----------|---------|--------------|-------------|---------|---------------------------|
| Log of per-head GDP                                           | 5.28     | 0.65    | 2.21         | 1.28        | 0.94    | 6.75                      |
| Control variables                                             | 60.09    | 7.63    | 41.71        | 49.02       | 47.27   | 58.41                     |
| Year fixed Effects                                            | 6.11     | 24.30   | 11.66        | 13.67       | 17.09   | 7.93                      |
| Country fixed effects                                         | 28.53    | 67.43   | 44.42        | 36.03       | 34.71   | 26.91                     |
| Pseudo R-squared                                              | 0.08     | 0.08    | 0.12         | 0.08        | 0.08    | 0.16                      |

Each column refers to one regression decomposition. Data for the per-head gross domestic product (GDP) were merged with Demographic and Health Survey data by survey year. All specifications include country and survey-year fixed effects as well as household and child/mother control variables.

**eTable 8.** Association Between Determinants and Indicators of Malnutrition—Shorrocks Decomposition

| Contribution of explanatory variables to pseudo R-squared (%) | Stunting | Wasting | Under-weight | Over-weight | Obesity | Dietary Diversity Failure |
|---------------------------------------------------------------|----------|---------|--------------|-------------|---------|---------------------------|
| Contributing factors                                          | 38.26    | 18.62   | 31.46        | 18.12       | 19.54   | 24.69                     |
| Control variables                                             | 29.86    | 5.24    | 23.53        | 37.94       | 32.22   | 39.40                     |
| Country fixed effects                                         | 31.88    | 76.14   | 45.01        | 43.94       | 48.24   | 35.92                     |
| Pseudo R-squared                                              | 0.08     | 0.10    | 0.14         | 0.09        | 0.09    | 0.17                      |

Each column refers to one regression decomposition. All specifications include country-fixed effects as well as household and child/mother control variables.

**eTable 9.** Association Between Economic Growth and Determinants of Malnutrition—Shorrocks Decomposition

| Contribution of explanatory variables to pseudo R-squared (%) | Delayed breastfeeding | No vitamin A suppl. | No iodized salt use | Incomplete vaccination | Recent infectious disease | No ORT given with diarrhea | No care sought for cough | High indoor pollution |
|---------------------------------------------------------------|-----------------------|---------------------|---------------------|------------------------|---------------------------|----------------------------|--------------------------|-----------------------|
| Log of per-head GDP                                           | 2.76                  | 5.38                | 11.16               | 0.87                   | 9.26                      | 4.43                       | 5.66                     | 19.11                 |
| Control variables                                             | 1.90                  | 7.85                | 6.72                | 16.10                  | 1.35                      | 9.19                       | 5.83                     | 38.14                 |
| Year fixed Effects                                            | 13.02                 | 25.14               | 22.10               | 12.67                  | 27.41                     | 26.59                      | 35.45                    | 6.06                  |
| Country fixed effects                                         | 82.32                 | 61.63               | 60.02               | 70.36                  | 61.97                     | 59.79                      | 53.06                    | 36.69                 |
| Pseudo R-squared                                              | 0.05                  | 0.06                | 0.24                | 0.05                   | 0.06                      | 0.05                       | 0.08                     | 0.64                  |

**Part 1**

Each column refers to one regression decomposition. Data for the per-head gross domestic product (GDP) were merged with Demographic and Health Survey data by survey year. All specifications include country and survey-year fixed effects as well as household control variables.

| Contribution of explanatory variables to pseudo R-squared (%) | No access safe drinking water | No access improved sanitation | Unsafe stool disposal | Inadequate antenatal care | No skilled birth attendant | Unsatisfied family planning | Maternal child marriage | No maternal educ. | Low maternal height | Low maternal BMI |
|---------------------------------------------------------------|-------------------------------|-------------------------------|-----------------------|---------------------------|----------------------------|-----------------------------|-------------------------|-------------------|---------------------|------------------|
| Log of per-head GDP                                           | 6.13                          | 4.35                          | 3.63                  | 7.62                      | 9.07                       | 12.13                       | 8.04                    | 6.41              | 5.61                | 1.08             |
| Control variables                                             | 35.85                         | 52.99                         | 29.61                 | 35.55                     | 35.67                      | 12.20                       | 34.01                   | 35.56             | 13.25               | 15.22            |
| Year fixed Effects                                            | 14.96                         | 11.17                         | 15.67                 | 8.79                      | 16.09                      | 37.61                       | 12.22                   | 6.67              | 16.71               | 18.87            |
| Country fixed effects                                         | 43.07                         | 31.48                         | 51.09                 | 48.05                     | 39.17                      | 38.06                       | 45.73                   | 51.37             | 64.43               | 64.82            |
| Pseudo R-squared                                              | 0.18                          | 0.36                          | 0.15                  | 0.14                      | 0.27                       | 0.18                        | 0.10                    | 0.28              | 0.14                | 0.12             |

**Part 2**

Each column refers to one regression decomposition. Data for the per-head gross domestic product (GDP) were merged with Demographic and Health Survey data by survey year. All specifications include country and survey-year fixed effects as well as household control variables.

**eFigure 1.** Association Between Determinants and Indicators of Malnutrition—Standard Model (15 Determinants)

**Stunting**

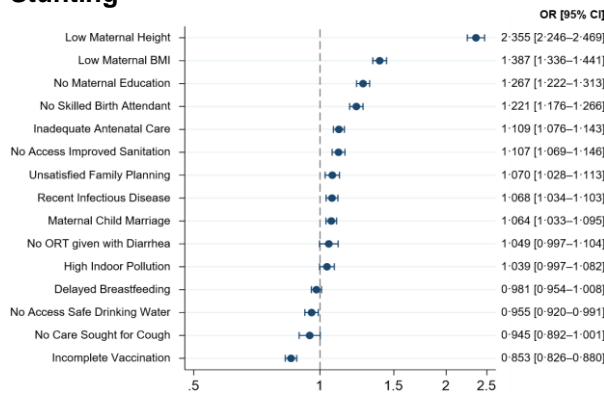

**Overweight**

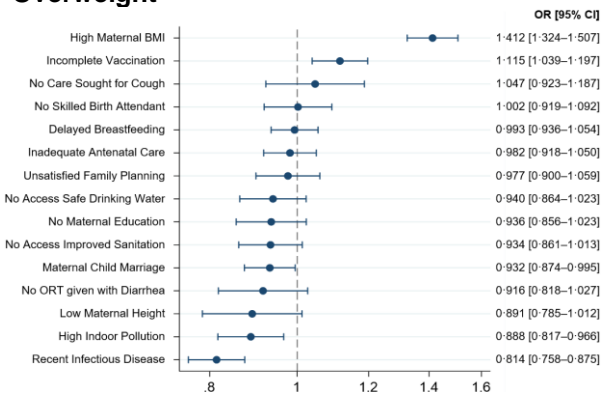

**Wasting**

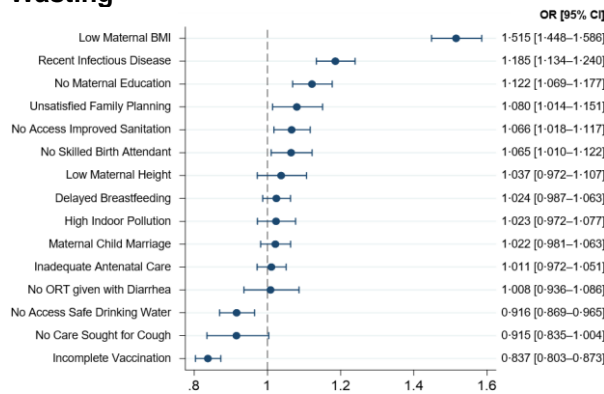

**Obesity**

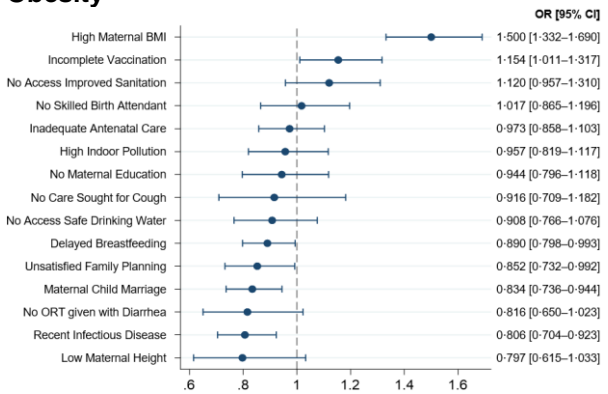

**Underweight**

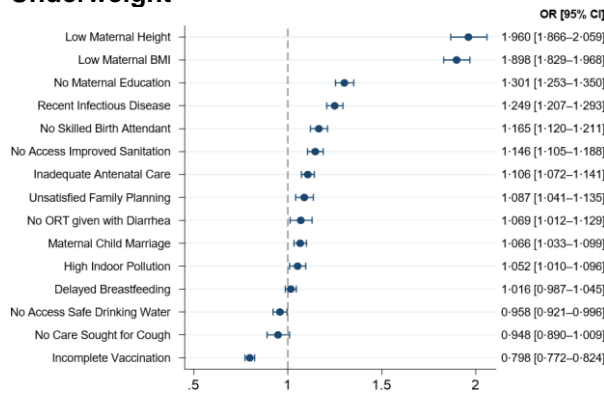

**Dietary Diversity Failure**

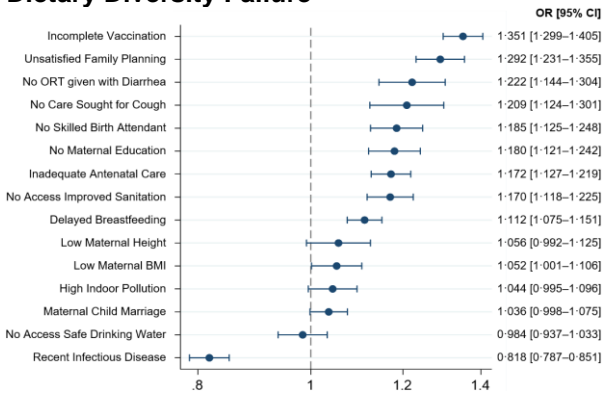

Circles represent point estimates of odds ratios associated with the various measures of malnutrition. Horizontal bars indicate 95% confidence intervals. BMI=body mass index (calculated as weight in kilograms divided by height in meters squared). ORT=oral rehydration therapy. N=135,310; Countries=56 (stunting). N=135,669; Countries=56 (wasting). N=135,567; Countries=56 (underweight). N=135,669; Countries=56 (overweight). N=134,079; Countries=55 (obesity). N=98,842; Countries=51 (dietary diversity failure).

**Figure 2. Association Between Determinants and Indicators of Malnutrition—Extended Model (18 Determinants)**

**Stunting**

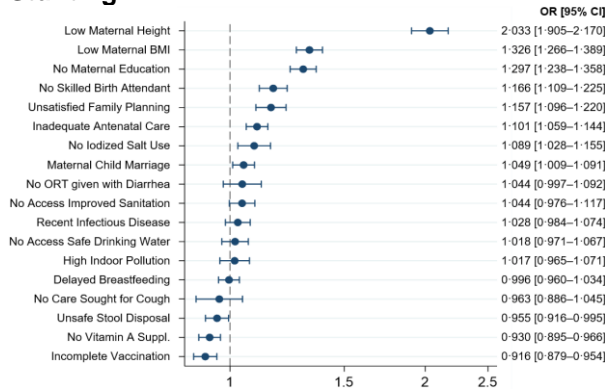

**Overweight**

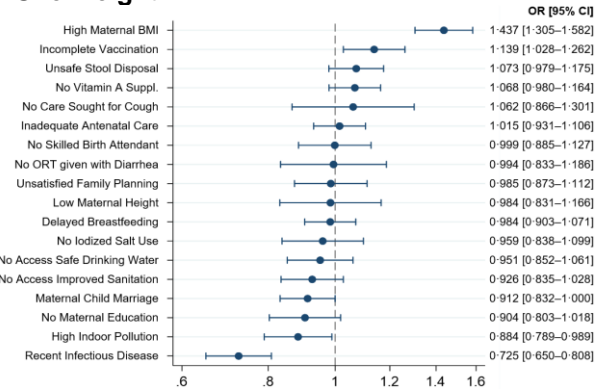

**Wasting**

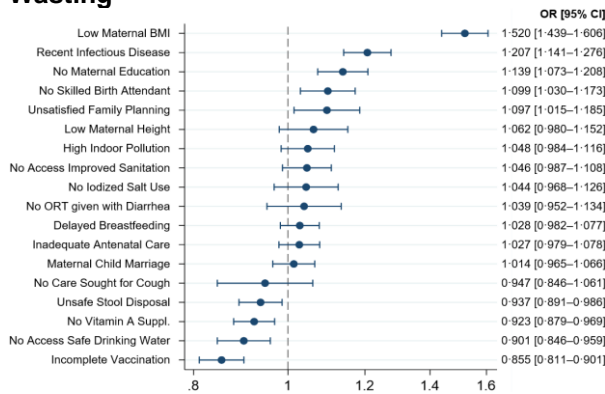

**Obesity**

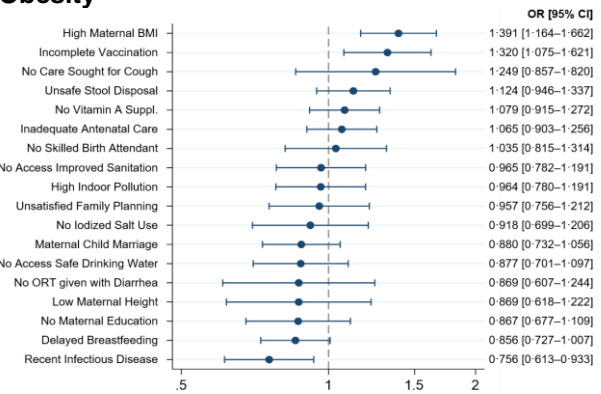

**Underweight**

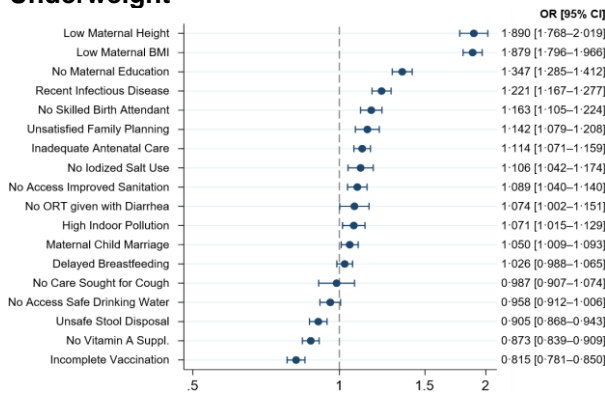

**Dietary Diversity Failure**

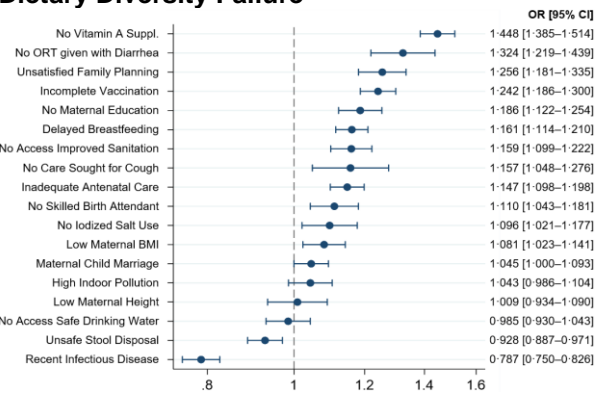

Circles represent point estimates of odds ratios associated with the various measures of malnutrition. Horizontal bars indicate 95% confidence intervals. BMI=body mass index (calculated as weight in kilograms divided by height in meters squared). ORT=oral rehydration therapy. N=72,411; Countries=36 (stunting). N=72,467; Countries=36 (wasting). N=72,411; Countries=36 (underweight). N=72,467; Countries=36 (overweight). N=73,262; Countries=36 (dietary diversity failure).

**eFigure 3.** Associations Between Per-Head GDP and Contributing Factors of Malnutrition

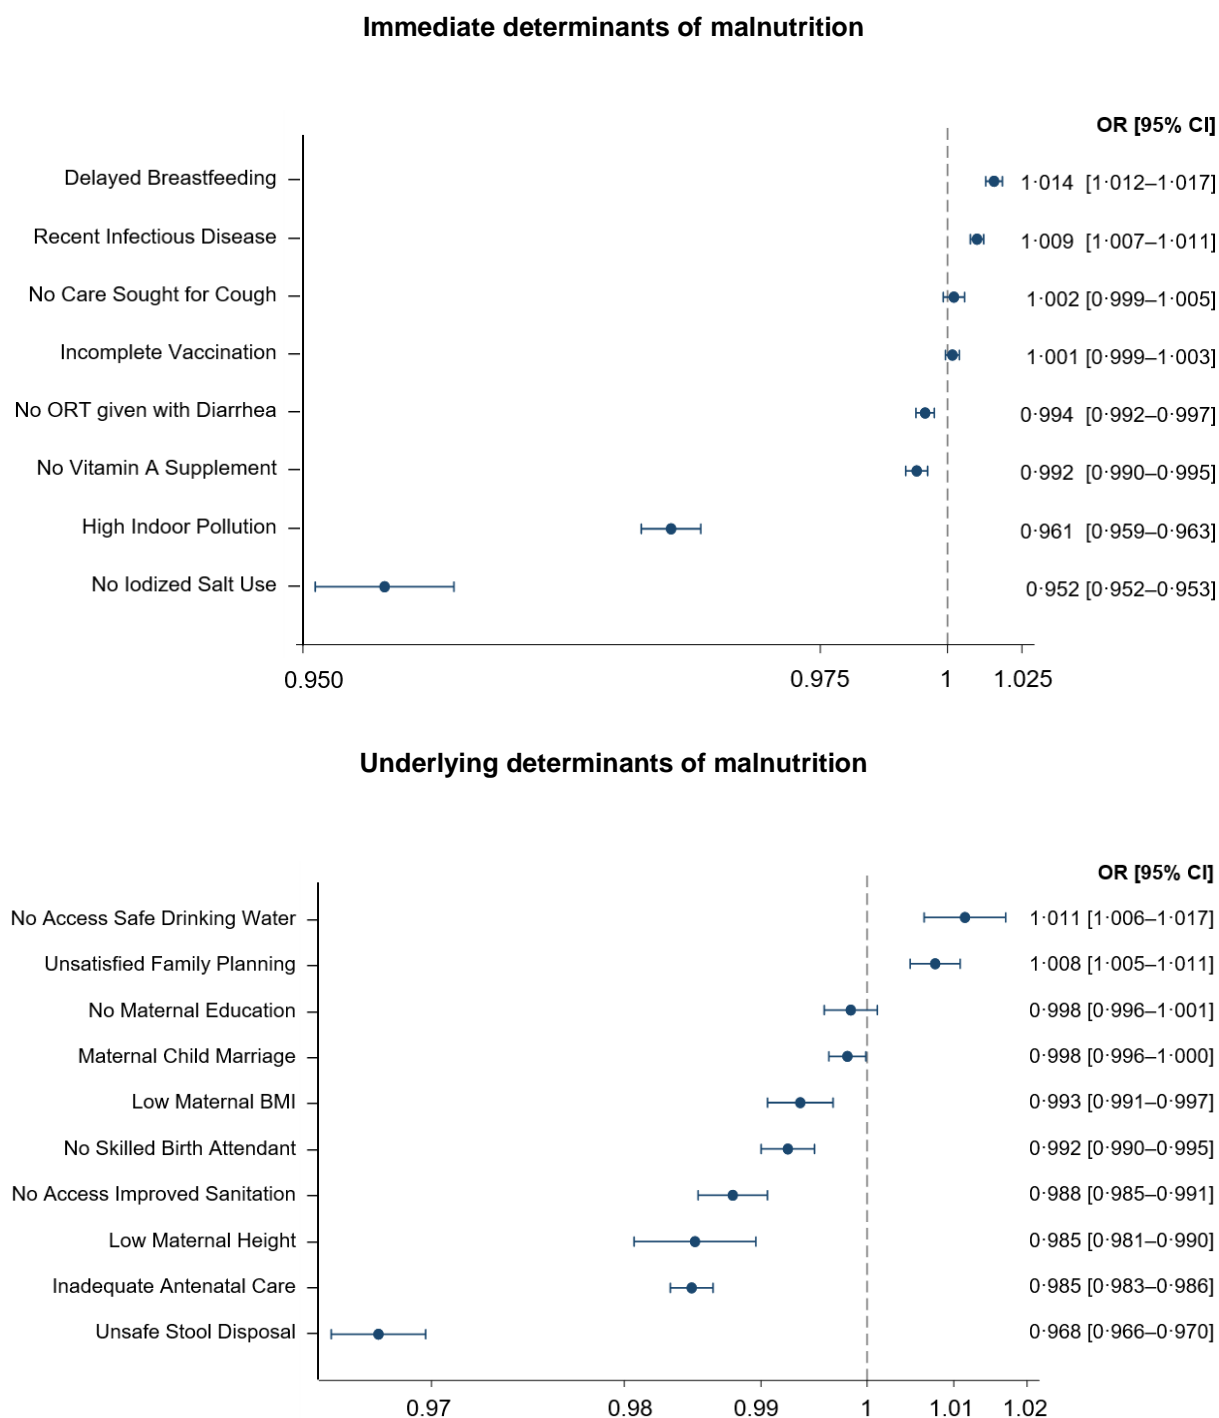

Circles represent point estimates of odds ratios associated with immediate determinants of malnutrition (a) and underlying determinants of malnutrition (b). Horizontal bars indicate 95% confidence intervals. GDP=gross domestic product. ORT=oral rehydration therapy. N=834,572 (no Vitamin A supplementation), N= 910,642 (delayed breastfeeding initiation), N= 1,067,017 (incidence of infectious diseases), N= 1,051,314 (incomplete course of vaccination), N= 1,019,887 (no care seeking for suspected pneumonia despite cough), N= 1,041,452 (no consumption of oral rehydration solution despite diarrhea), N= 977,267 (high indoor pollution through solid cooking fuels), N= 419,397 (no iodized salt use). N= 637,120 (unsatisfied family planning needs), N= 1,035,846 (maternal child marriage), N= 1,138,568 (no maternal education), N= 1,077,132 (no skilled birth attendant), N= 1,082,733 (no access to safe drinking water), N= 826,307 (low maternal BMI), N= 902,576 (low maternal height), N= 1,094,647 (no access to improved sanitation facilities), N= 970,018 (inadequate antenatal care), N= 753,504 (unsafe practices for child's stool disposal).
