# Supplementary material for: Economic Growth and Childhood Malnutrition in Low- and Middle-Income Countries
Source: PubMed Central journal article supplement (PMC10636637; doi:10.1001/jamanetworkopen.2023.42654), 2023-11-09
Supplement: jamanetwopen-e2342654-s002.pdf [file jamanetwopen-e2342654-s002.pdf]

## Data Sharing Statement

Büttner. Economic Growth and Childhood Malnutrition in Low- and Middle-Income Countries. *JAMA Netw Open*. Published November 09, 2023. doi:10.1001/jamanetworkopen.2023.42654

### Data

**Data available:** No

### Additional Information

**Explanation for why data not available:** The data used in this study is publicly available.
